# Supplementary material for: Light-assisted coupling of phenols with CO2 to 2-hydroxybenzaldehydes catalyzed by a g-C3N4/NH2-MIL-101(Fe) composite
Source: Royal Society of Chemistry journal article supplement (doi:10.1039/d2cy01430k), 2022-01-01
Supplement: d2cy01430k1.pdf [file d2cy01430k1.pdf]

## Supporting Information

### Light Assisted Coupling of Phenols with CO<sub>2</sub> to 2-Hydroxy-benzaldehydes Catalyzed by g-C<sub>3</sub>N<sub>4</sub> /NH<sub>2</sub>-MIL-101(Fe) composite

Sakshi Bhatt,<sup>1,2</sup> Ranjita S. Das<sup>3</sup>, Anupama Kumar<sup>3</sup>, Anil Malik,<sup>1,2</sup> Aishwarya Soni<sup>1</sup>, Suman L  
Jain,<sup>1\*</sup>

<sup>1</sup>*Chemical & Material Sciences Division, CSIR-Indian Institute of Petroleum, Haridwar  
Road, Mohkampur, Dehradun-248005, India.*

<sup>2</sup>*Academy of Scientific and Innovative Research, Ghaziabad- 201002, India.*

<sup>3</sup>*Visvesvaraya National Institute of Technology (VNIT) Nagpur-440010 India*

\*Corresponding Author: [suman@iip.res.in](mailto:suman@iip.res.in), +911352525788

#### Content:

Characterization Techniques

(Figure S1) BET Plot of g-C<sub>3</sub>N<sub>4</sub> and FEM-10

(Figure S2) Thermograms of g-C<sub>3</sub>N<sub>4</sub>, MOF and FEM-10 composite

(Figure S3) Elemental Mapping image of FEM-10

(Figure S4) FE-SEM of g-C<sub>3</sub>N<sub>4</sub>, FEMO and FEM-10

(Figure S5) XPS spectra of FEMO

(Figure S6) XPS spectra of g-C<sub>3</sub>N<sub>4</sub>

(Figure S7) optimized geometry of reactant, product and transition state

(Table S1) Physicochemical parameter obtained from computational calculations

Detailed steps of the reaction mechanism

(Figure S8-S25) <sup>1</sup>H and <sup>13</sup>C NMR of the products

## Characterization Techniques

UV-VIS absorption spectra of the samples were recorded on Perkin Elmer Lambda 750 UV-VIS-NIR spectrophotometer with a 10-mm quartz cell using BaSO<sub>4</sub> as a reference. High-resolution transmission electron microscopy (HR-TEM) was done using a JEM 2100 (JEOL, Japan) microscope by mounting the ethanol dispersed sample on a Lacey carbon-coated Cu grid. A field emission scanning electron microscope (FESEM) (JEOL JSM7610F) equipped with an EDS (Oxford Instruments) was used for the determination of the morphological features of the samples. X-ray diffraction (XRD) pattern was recorded to determine the crystallinity of the materials using Bruker D8 Advance diffractometer at 40 kV and 40 mA with Cu K $\alpha$  radiation ( $\lambda = 0.15418$  nm). The scan range was  $2\theta = 20^\circ$  to  $70^\circ$  with a scan rate of  $0.02^\circ/\text{s}$ . The BET surface area ( $S_{\text{BET}}$ ), pore volume (VP), and mean pore diameter (RP) of composites were estimated using N<sub>2</sub> adsorption-desorption isotherm at 77K using BELSORP-max TPD pro-Chem Master analyzer. All the samples were degassed at  $200^\circ\text{C}$  for 3h under N<sub>2</sub> atmosphere. Fourier transform infrared spectroscopy (FT-IR) was used to determine the stretching and bending vibrations and was recorded in the range of  $4000\text{--}400\text{ cm}^{-1}$  on an AlphaBruker FTIR spectrometer with a wavenumber resolution of  $4\text{ cm}^{-1}$  in the transmission mode in spectroscopic grade KBr pellets for all the powders. X-ray photoelectron spectroscopy (XPS) analysis was performed on KRATOS AXIS 165 with Mg K $\alpha$  irradiation. Thermogravimetric analysis (TGA) was carried out using a thermal analyzer TASDT Q-600. The thermogravimetric analysis determined the thermal degradation pattern of the materials in the temperature range of  $40\text{--}800^\circ\text{C}$  under nitrogen flow with a scan rate of  $10^\circ\text{C}/\text{min}$  heating rate. The photoelectrochemical analysis (PEC), such as cyclic voltammetry (CV), linear sweep voltammetry (LSV), electron impedance spectroscopy (EIS) and mottschotkey (MS) were performed on Versat-4 potentiostat in CO<sub>2</sub> saturated 0.1M aqueous KHCO<sub>3</sub> solution with Pt as a counter and Ag/AgCl as a reference electrode. The synthesized

material coated on the FTO plate was used as a working electrode. During the analysis, the active surface area of the working electrode was taken as 1 cm<sup>2</sup>.

### Surface area

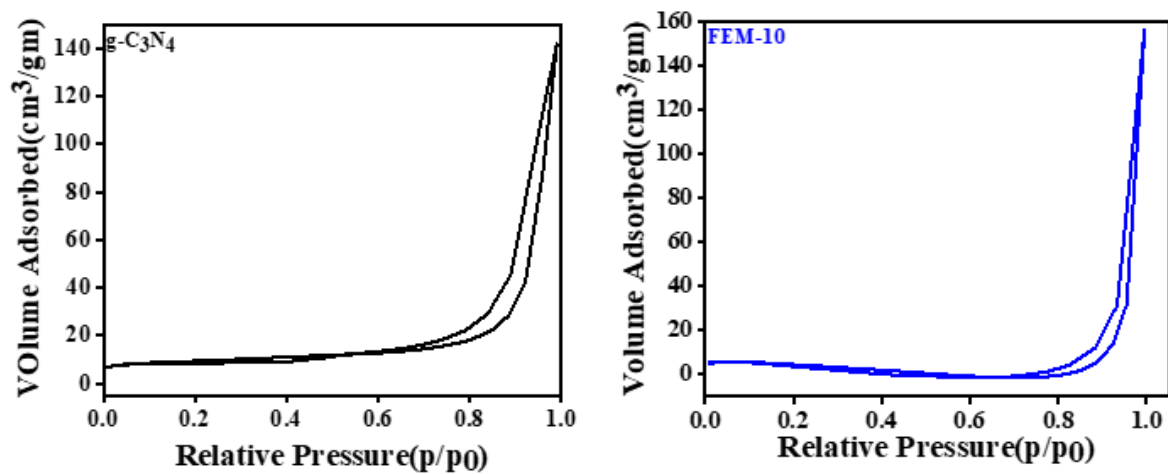

**Figure S1:** N<sub>2</sub> adsorption-desorption isotherm of g-C<sub>3</sub>N<sub>4</sub> and FEM-10

## Thermal stability of the samples

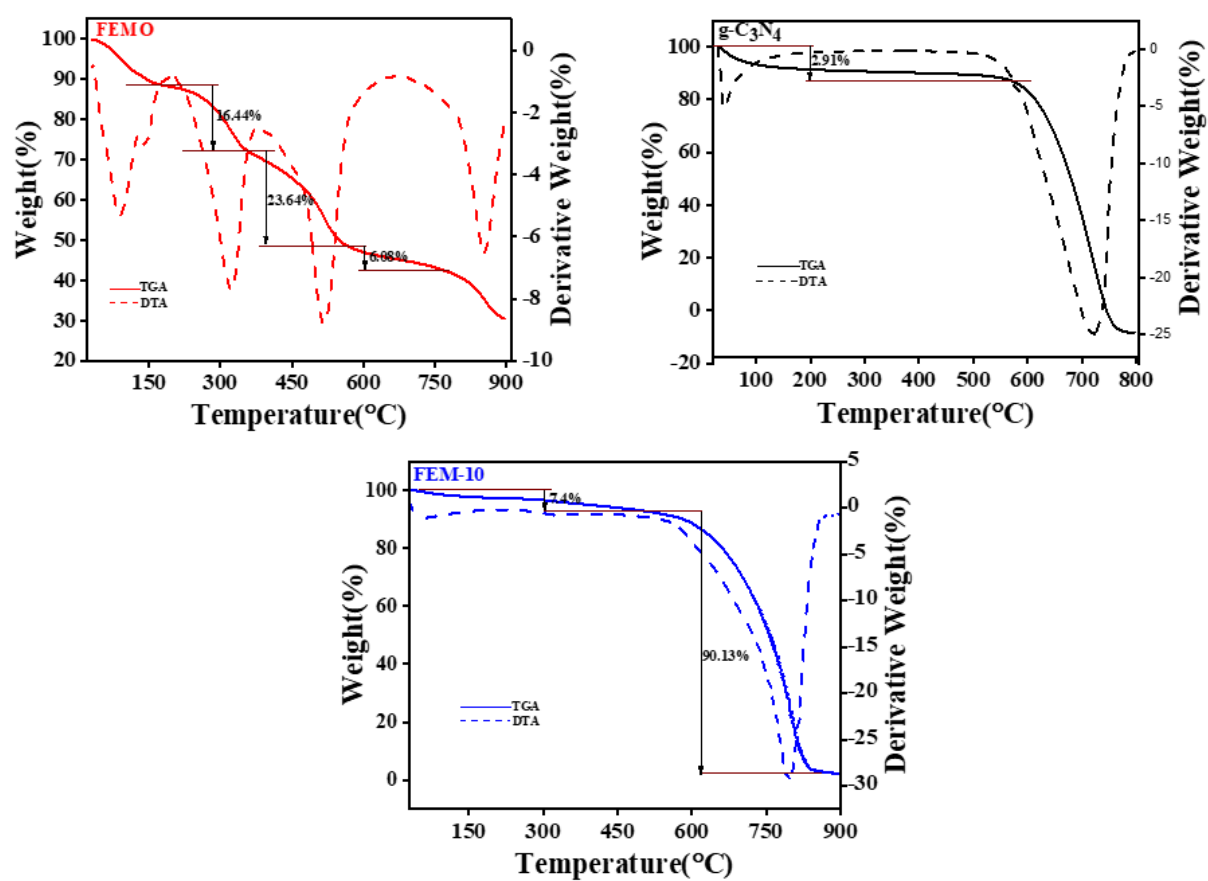

**Figure S2:** TG/DTA of FEMO, g-C<sub>3</sub>N<sub>4</sub> and active photocatalyst FEM-10

## Elemental mapping of FEM-10

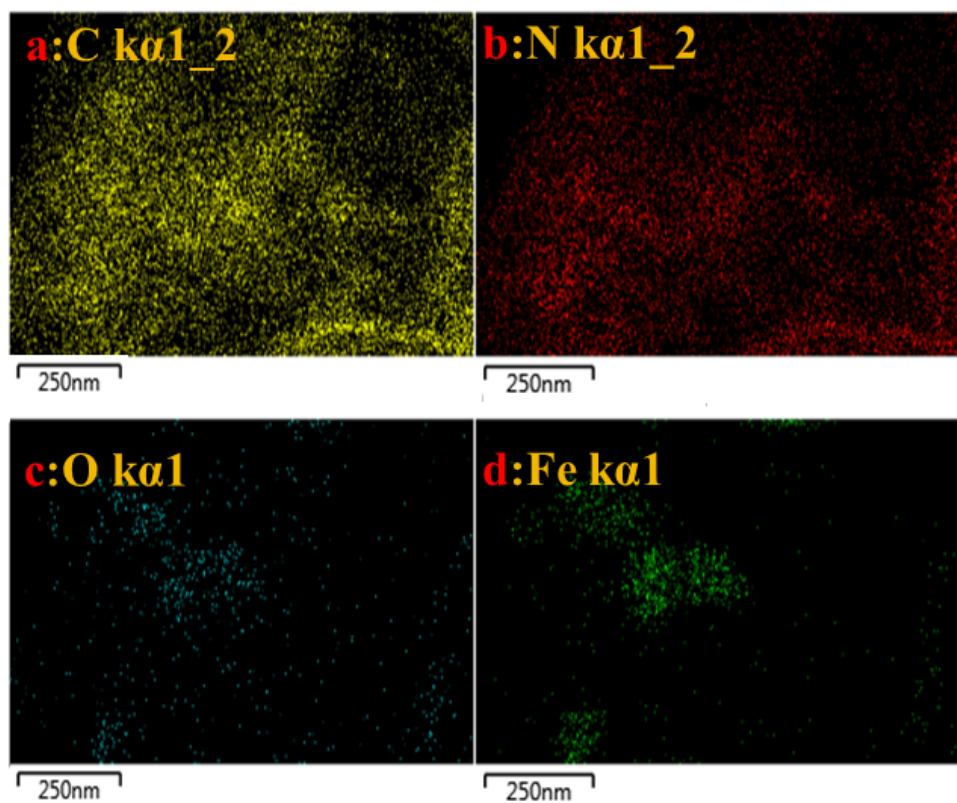

*Figure S3:* Elemental mapping of (a)-C, (b)-N, (c)-O, and (d)-Fe of FEM-10

## FE-SEM of the materials

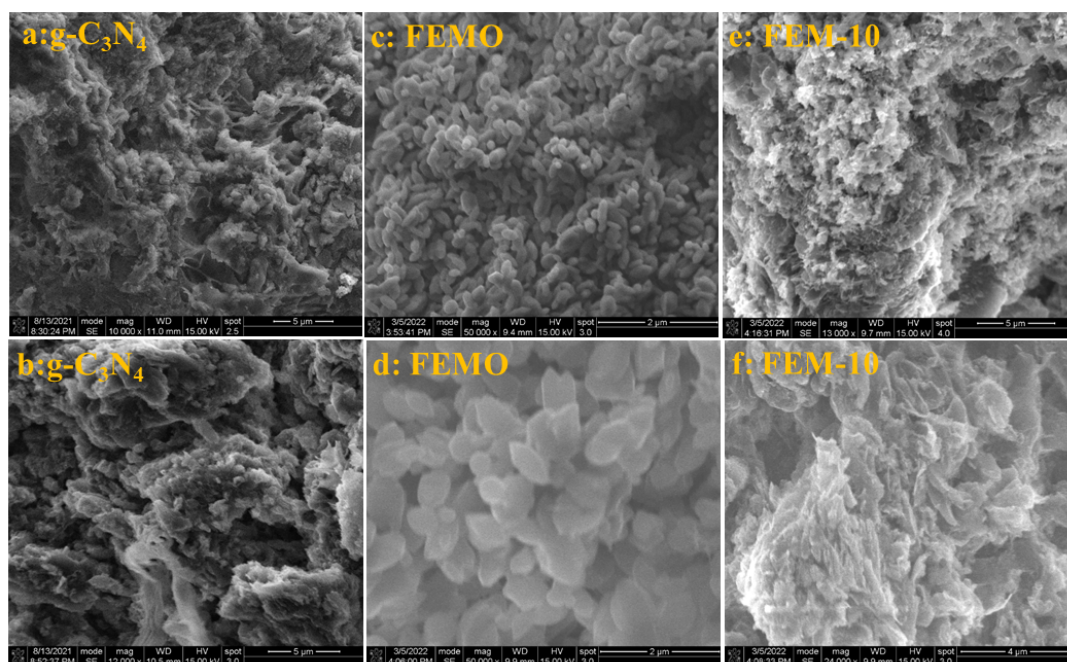

**Figure S4:** FE-SEM image of (a), (b)-g-C<sub>3</sub>N<sub>4</sub>, (c), (d)-FEMO and (e), (f)- FEM-10

## XPS of FEMO and g-C<sub>3</sub>N<sub>4</sub>

The elemental composition and electronic state of FEMO were determined using the XPS as presented in *Figure S5*. In the XPS Fe(2p) spectra of FEMO, two peaks at binding energy 711.8 eV and 725.5 eV corresponded to Fe(2p<sub>3/2</sub>) and Fe(2p<sub>1/2</sub>) energy levels, respectively are observed. A single satellite signal is also obtained nearly at 716.0 eV. The deconvoluted O(1s) spectra exhibit two peaks at binding energy 530.9 eV and 532.7 eV, corresponded to the Fe-O and C-O bonds, respectively. The N(1s) XPS spectra reveal two peaks, in which the first peak appeared at 398.5 eV is attributed to the H-N-H bond. Another peak at 400.84 eV is related to the protonated amine (NH<sup>+</sup>) group. The C(1s) spectra display three peaks at binding energy 284.3 eV, 285.3 eV and 288.2 eV, which are ascribed to the C-C, C-O-C, and C=O bonds.

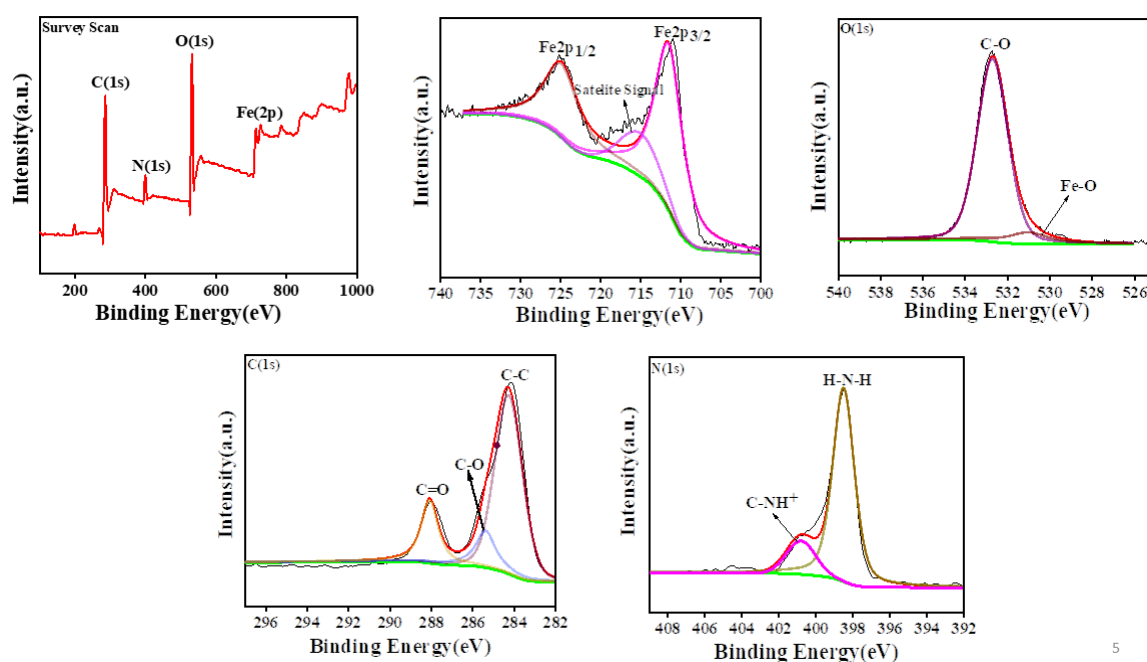

**Figure S5:** XPS spectra of FEMO

The XPS spectra of pristine g-C<sub>3</sub>N<sub>4</sub> are shown in *Figure S6*. In the XPS spectra of N(1s), three peaks at binding energies 405.4 eV (N-H), 401.2 eV (N=C), and 399.3 eV (C-N) are

appeared. Further, XPS spectra of the C (1s), exhibit three peaks at binding energies 294 eV (C-H), 288.8 eV (N=C), and 285.1 eV (C-C) of g-C<sub>3</sub>N<sub>4</sub>.

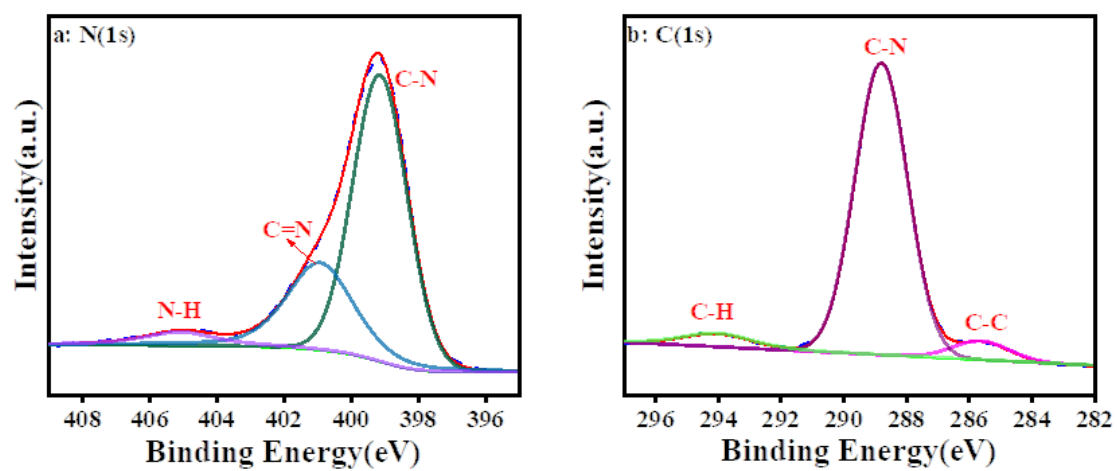

**Figure S6:** XPS spectra of g-C<sub>3</sub>N<sub>4</sub>, a) N(1s) and b) O (1s)



Optimized geometry of the reactants, product and involved transition state

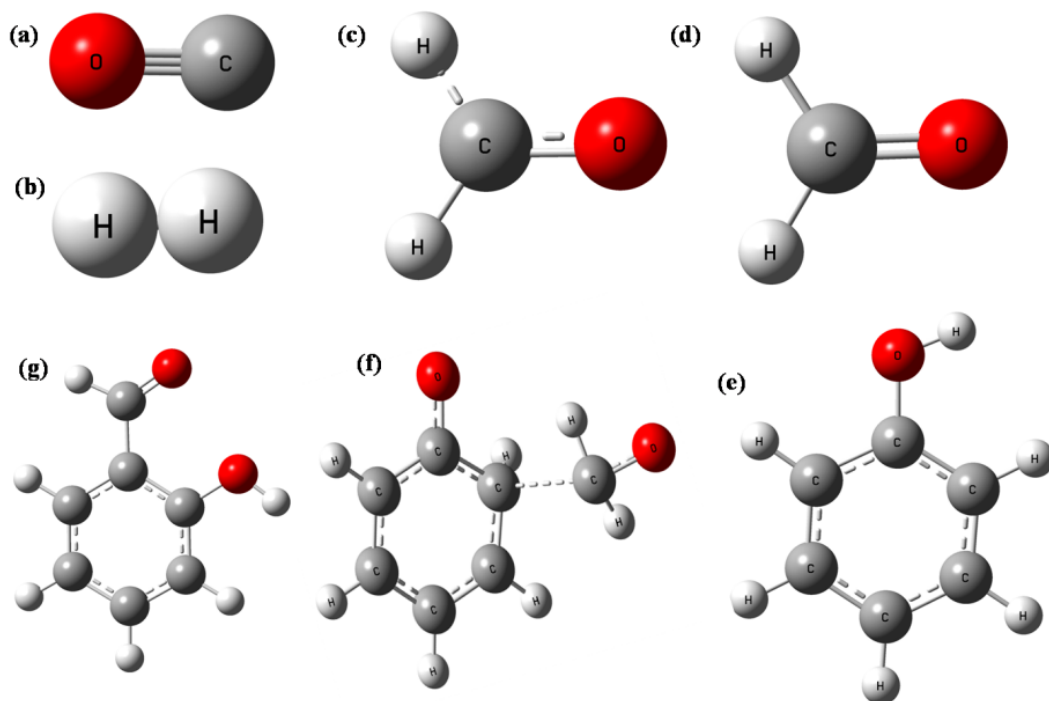

**Figure S7:** optimized geometry of: a) Carbon monoxide, b) H<sub>2</sub> molecule, c) formaldehyde transition state, d) formaldehyde e) phenol, f) transition state between phenol and formaldehyde and g) 2-hydroxyl benzaldehyde.

**Table S1:** Physicochemical parameter calculated from molecular simulated calculation

| <b>Compounds</b>                                             | <b>Energy<br/>(Hartree)</b> | <b>Polarizability<br/>(a.u)</b> | <b>Dipole<br/>moment<br/>( Debye)</b> | <b>Molecular<br/>weight<br/>(AMU)</b> |
|--------------------------------------------------------------|-----------------------------|---------------------------------|---------------------------------------|---------------------------------------|
| FEMO complex                                                 | -0.81147158                 | 425.68867                       | 19.058014                             | 755.83415                             |
| g-C <sub>3</sub> N <sub>4</sub> -complex                     | 0.19324009                  | 216.30433                       | 0.4432                                | 302.17159                             |
| FEMO@ g-C <sub>3</sub> N <sub>4</sub> (1:1<br>ratio) complex | -0.74019602                 | 637.18933                       | 18.017648                             | 1058.0057                             |
| FEMO@ g-C <sub>3</sub> N <sub>4</sub> (1:2<br>ratio) complex | -0.52393955                 | 846.91086                       | 34.470675                             | 1360.1773                             |
| Carbon dioxide (GO)                                          | -0.021801762                | 9.3823333                       | 0.1725                                | 27.994915                             |
| Hydrogen molecule (H <sub>2</sub> )                          | -0.041006648                | 1.395                           | 0                                     | 2.0156501                             |
| Formaldehyde (H <sub>2</sub> CO)                             | -0.032922707                | 9.8363333                       | 2.8172                                | 30.010565                             |
| Phenol (C <sub>6</sub> H <sub>5</sub> OH)                    | -0.033276298                | 51.629                          | 1.3598612                             | 94.041865                             |
| o-hydroxyl<br>benzaldehyde (product)                         | -0.086517929                | 67.376667                       | 3.3270445                             | 122.03678                             |

## Detailed steps of the reaction mechanism for the conversion of phenol to 2-hydroxyl benzaldehyde

Based on the molecular simulation result, the possible reaction mechanism for transformation of phenol to o-hydroxyl benzaldehyde in presence of CO<sub>2</sub> under visible light irradiation was established and described in four different steps as follows-

### Step-1

#### Excitation of electron

According to the simulation study, synthesized FEM-10 catalyst generate electron-hole (e<sup>-</sup> - h<sup>+</sup>) pair in conduction band (CB) and valence band (VB) respectively under visible light irradiation. The generated electron in CB was further used for conversion of CO<sub>2</sub> to CO and H<sub>2</sub> molecule.

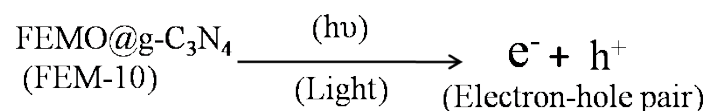

### Step-2

#### Generation of CO and H<sub>2</sub>

The generated electron in step-1 was used for photoreduction of Fe atom present in FEM-10 catalyst from Fe<sup>+3</sup> to Fe<sup>+2</sup> followed by addition of CO<sub>2</sub> to form FEM-10-CO<sub>2</sub> complex respectively. Afterward, obtained FEM-10-CO<sub>2</sub> complex was passed through various steps like metal ligand charge transfer (MLCT) pathway followed by protonation and dehydration then finally release CO and H<sub>2</sub> molecule. The explained mechanism below was established based on the article reported by J. Lin et al since 2018 with some modification<sup>8</sup>

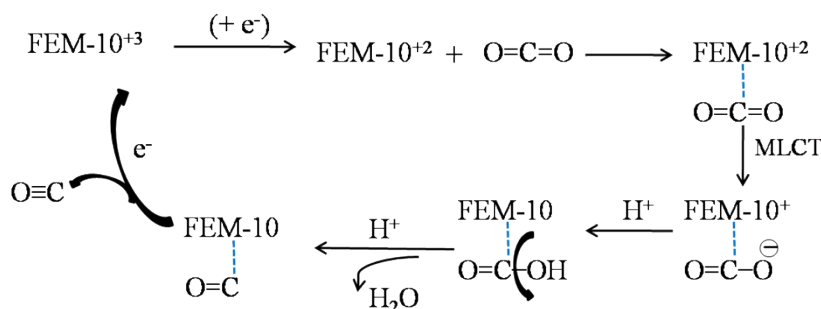

### Step-3

#### Formation of Formaldehyde (reactive species)

In step-3, formaldehyde was generated by the reaction of CO and H<sub>2</sub> release from step-2 via simple nucleophilic addition reaction pathway.

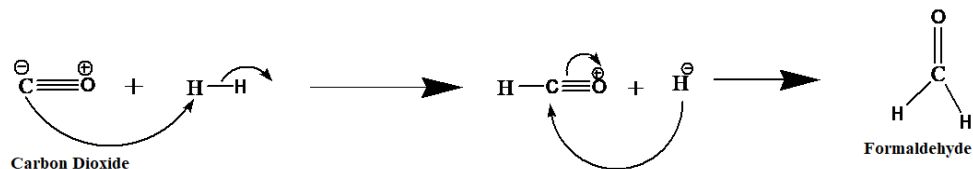

### Step-4

#### Conversion of phenol to o-hydroxyl benzaldehyde

Step-4 described the coupling of phenol with formaldehyde in presence of strong base to form o-hydroxy benzaldehyde. The formaldehyde was attacked to the ortho position of phenol due to its more electron density in ortho and para position as it is an electron donating group. The possible reaction mechanism is given below.

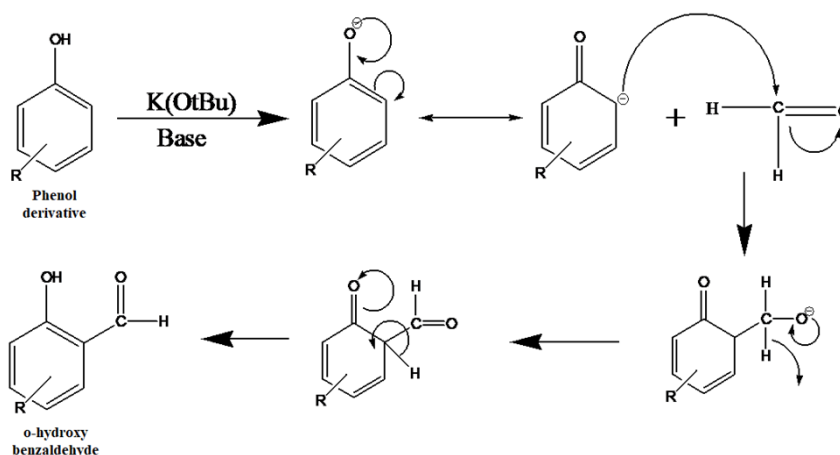

## Product characterization data ( $^1\text{H}$ & $^{13}\text{C}$ NMR)

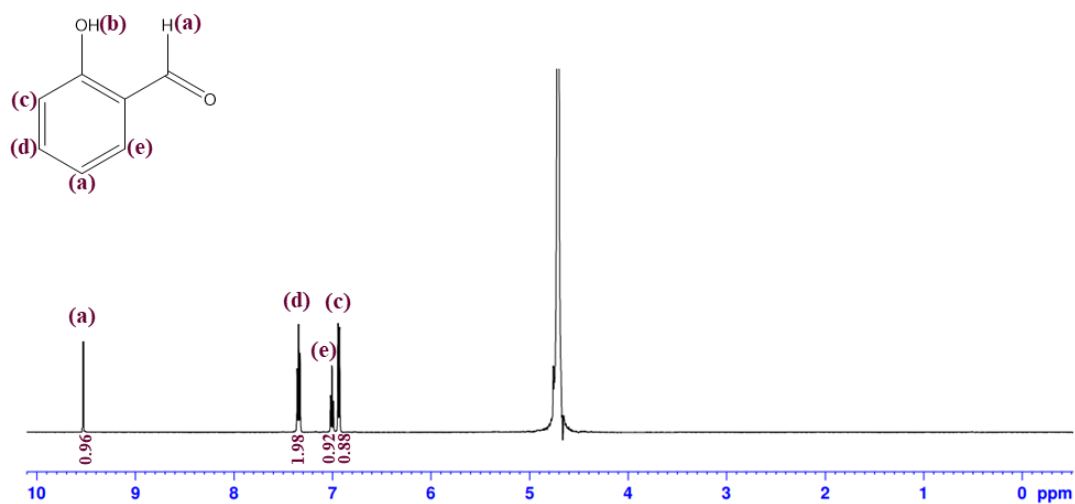

**Fig. S8:**  $^1\text{H}$  NMR spectrum of salicylaldehyde (Table-3, entry 1)

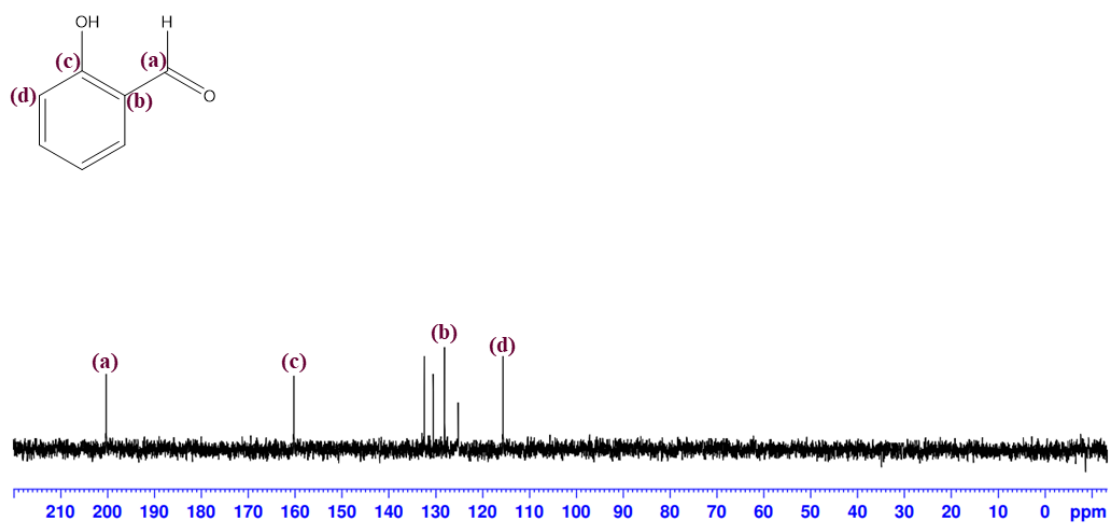

**Fig. S9:**  $^{13}\text{C}$  NMR spectrum of Salicylaldehyde (Table-3, entry 1)

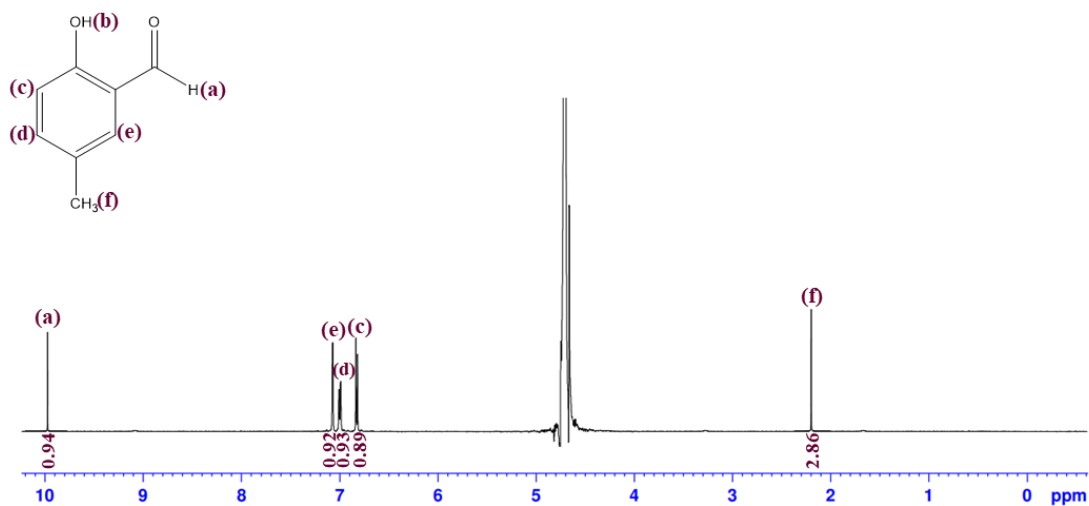

**Fig. S10:** <sup>1</sup>H NMR spectrum of 2-hydroxy-5-methylbenzaldehyde (Table-3, entry 2)

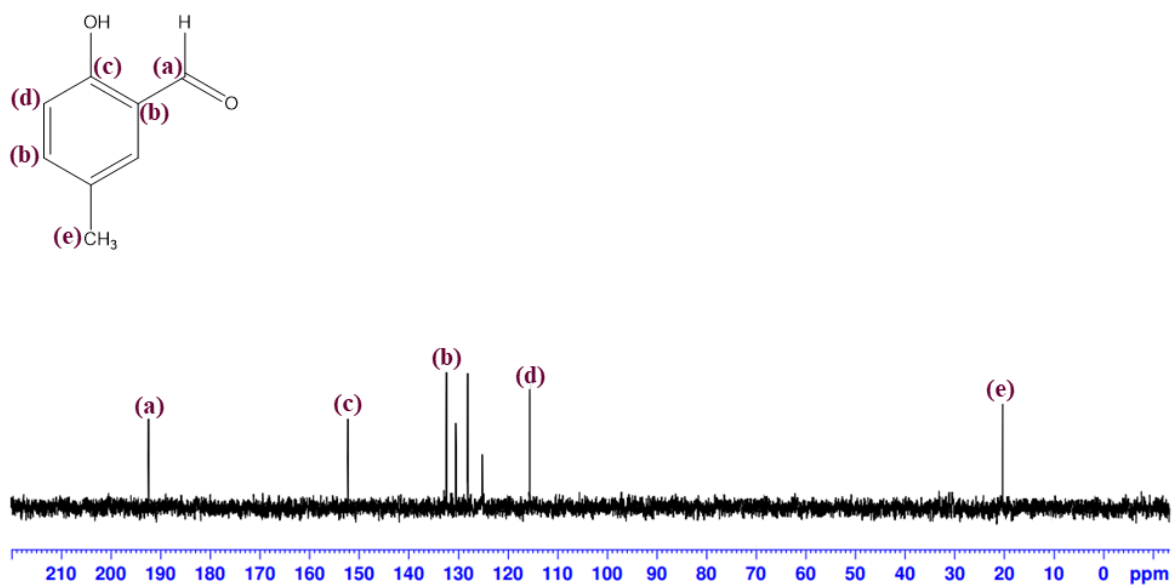

**Fig. S11:** <sup>13</sup>C NMR spectrum of 2-hydroxy-5-methylbenzaldehyde (Table-3, entry 2)

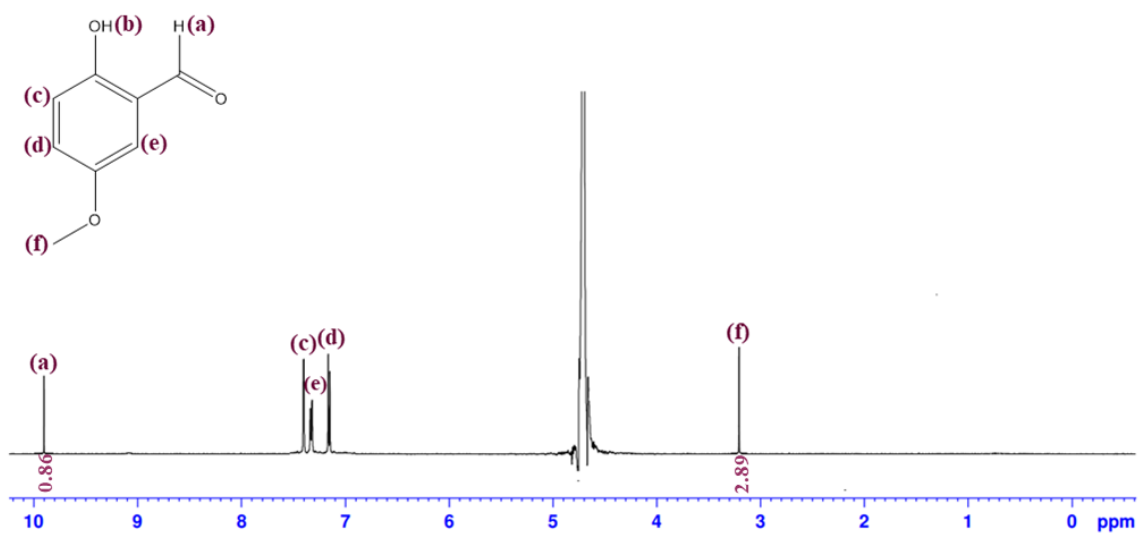

**Fig. S12:** <sup>1</sup>H NMR spectrum of 2-hydroxy-5-methoxybenzaldehyde  
(Table-3, entry 3)

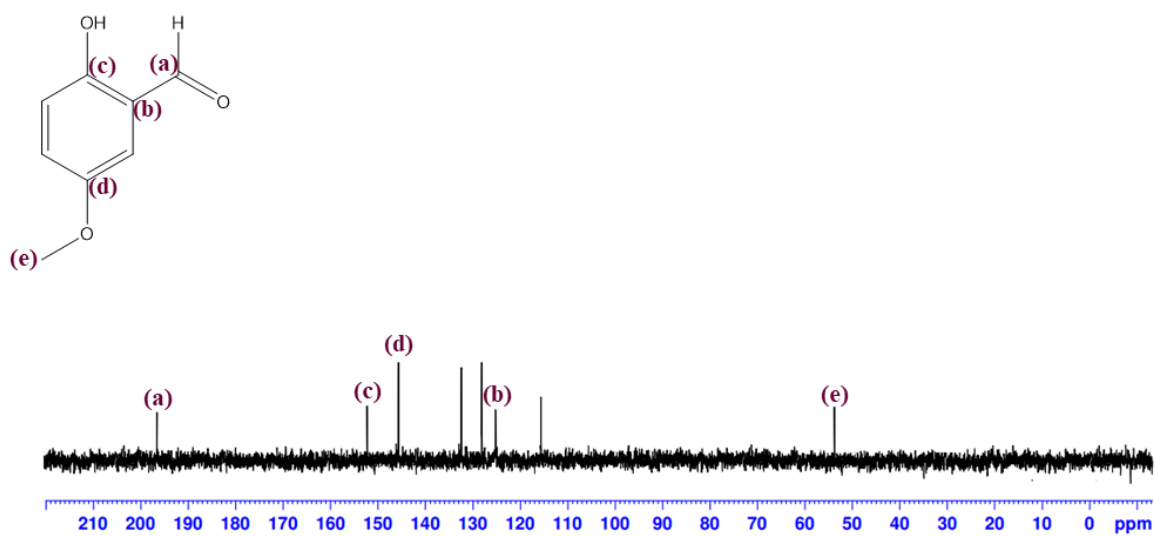

**Fig. S13:** <sup>13</sup>C NMR spectrum of 2-hydroxy-5-methoxybenzaldehyde  
(Table-3, entry 3)

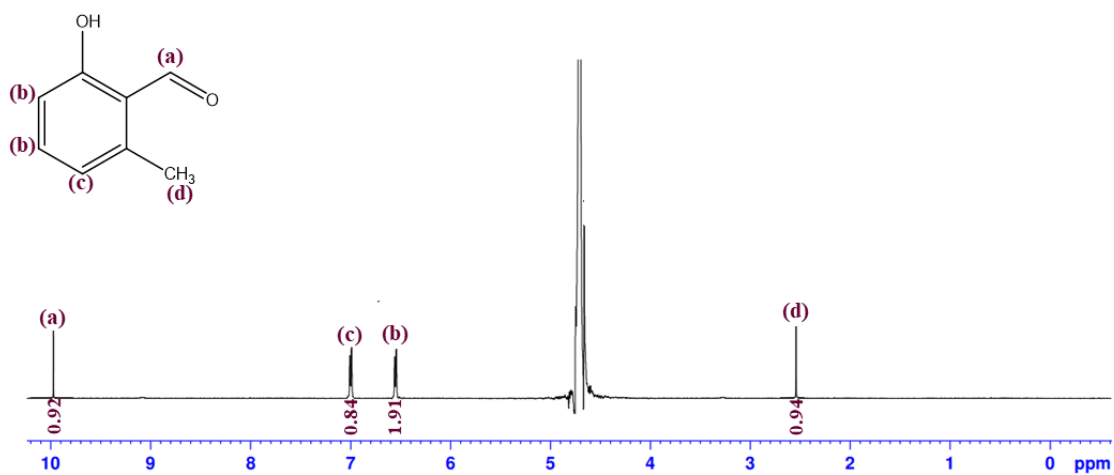

**Fig. S14:** <sup>1</sup>H NMR spectrum of 2-hydroxy-6-methylbenzaldehyde (Table-3, entry 4)

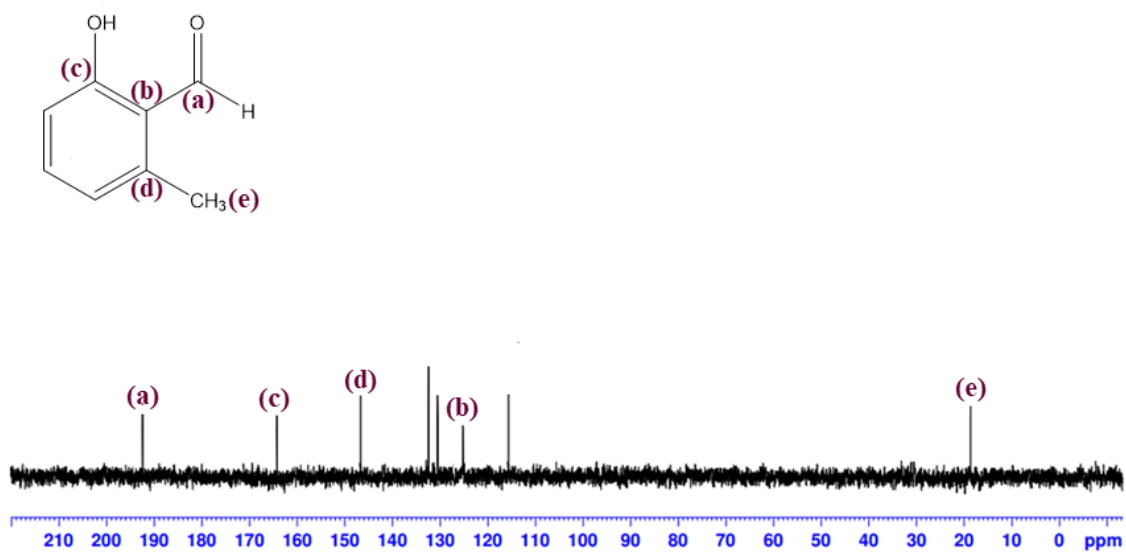

**Fig. S15:** <sup>13</sup>C NMR spectrum of 2-hydroxy-6-methylbenzaldehyde (Table-3, entry 4)



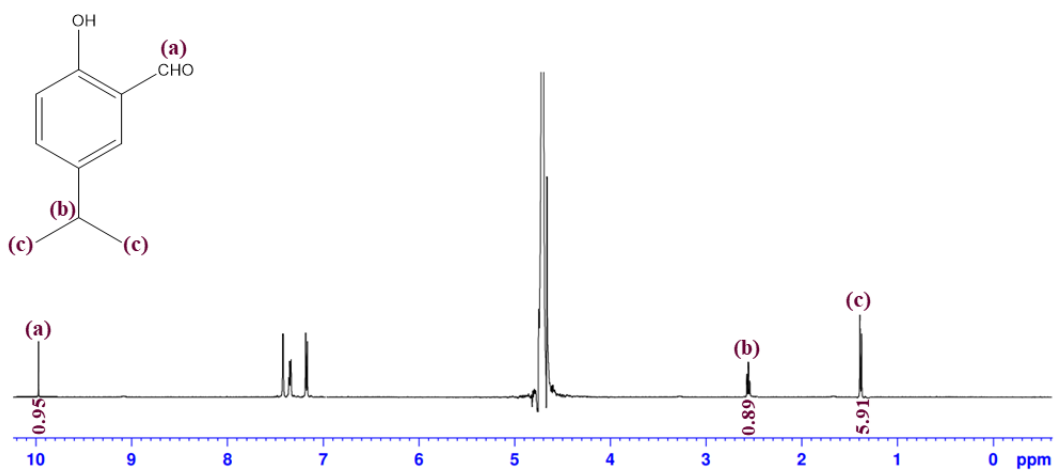

**Fig. S16:**  $^1\text{H}$  NMR spectrum of 2-hydroxy-5-isopropylbenzaldehyde (Table-3, entry 5)

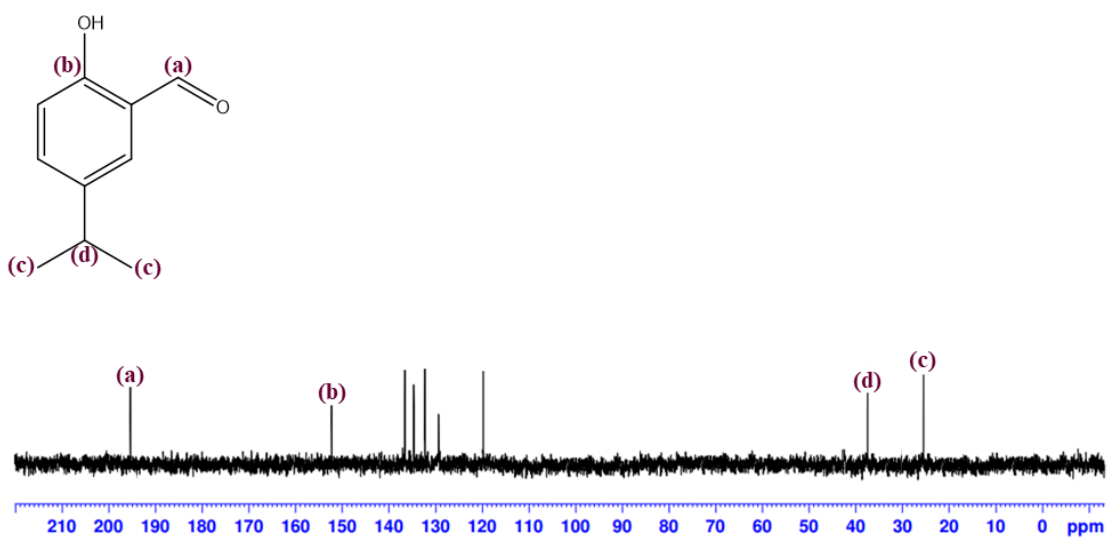

**Fig. S17:**  $^{13}\text{C}$  NMR spectrum of 2-hydroxy-5-isopropylbenzaldehyde (Table-3, entry 5)

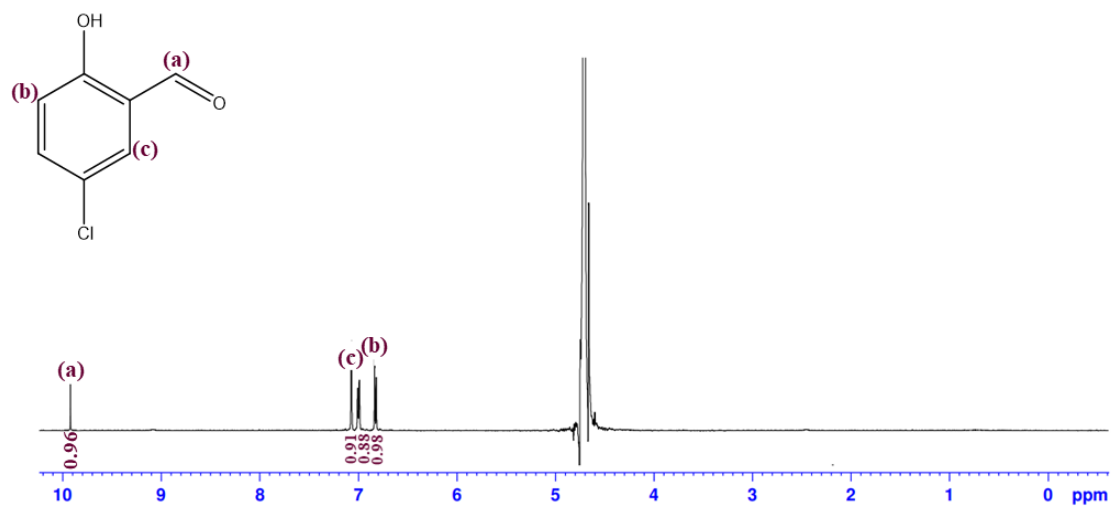

**Fig. S18:**  $^1\text{H}$  NMR spectrum of 5-chloro-2-hydroxybenzaldehyde (Table-3, entry 9)

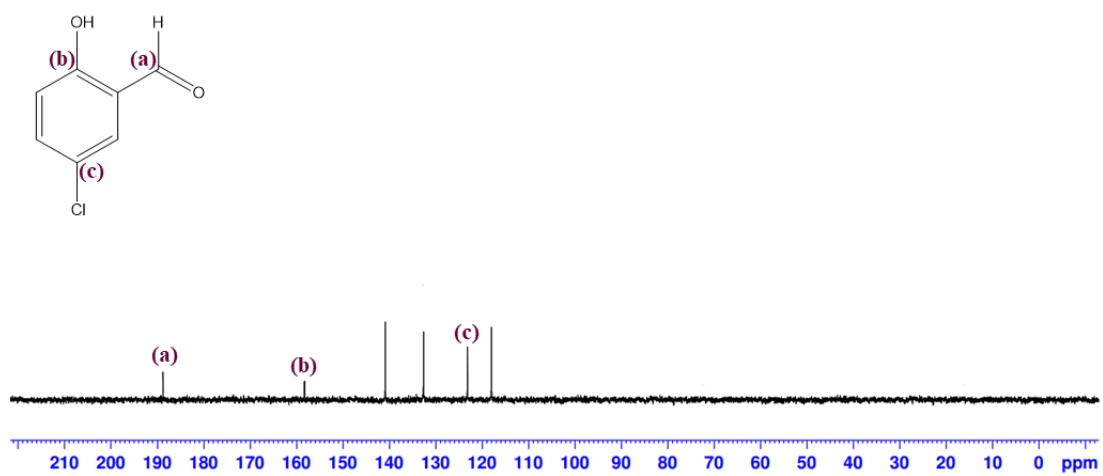

**Fig. S19:**  $^{13}\text{C}$  NMR spectrum of 5-chloro-2-hydroxybenzaldehyde (Table-3, entry 9)

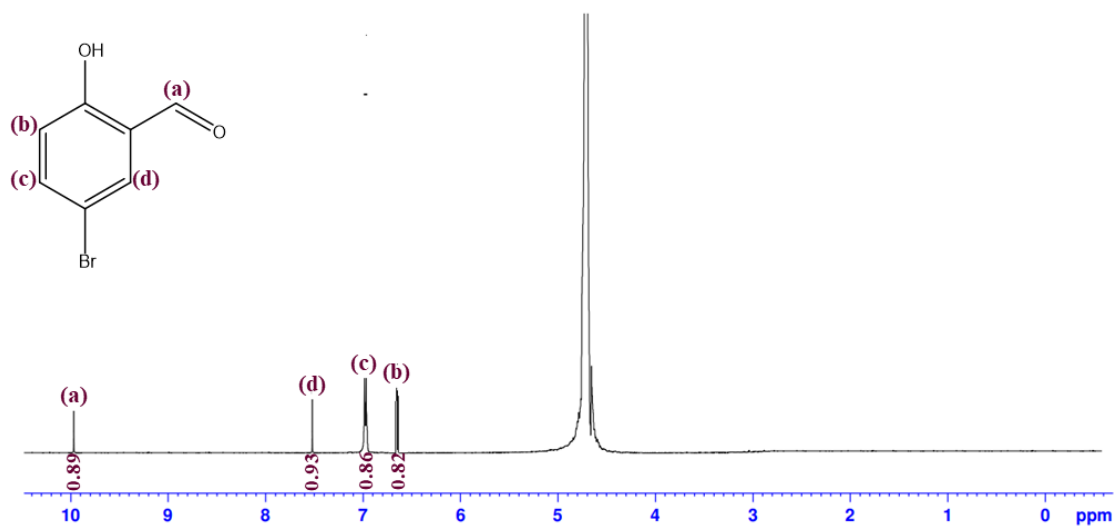

**Fig. S20:** <sup>1</sup>H NMR spectrum of 5-bromo-2-hydroxybenzaldehyde (Table-3, entry 10)

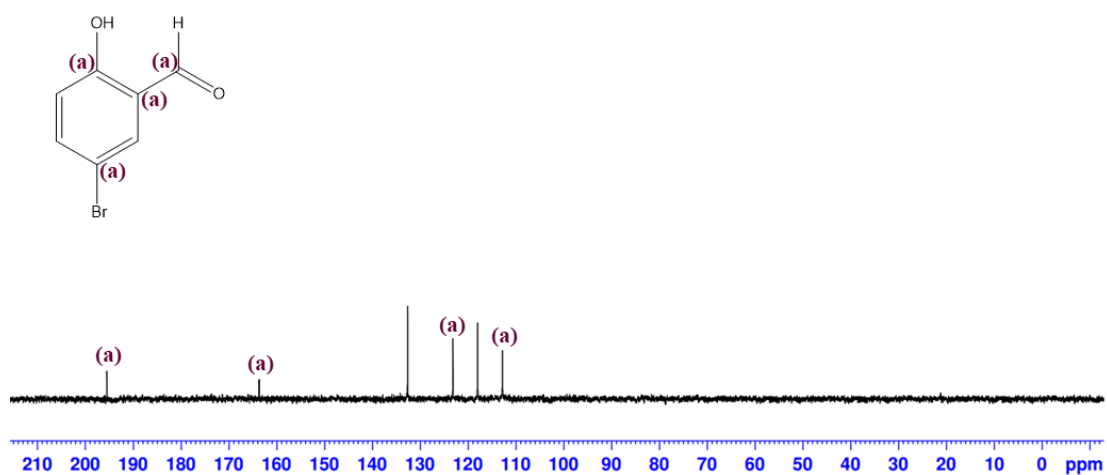

**Fig. S21:** <sup>13</sup>C NMR spectrum of 5-bromo-2-hydroxybenzaldehyde (Table-3, entry 10)

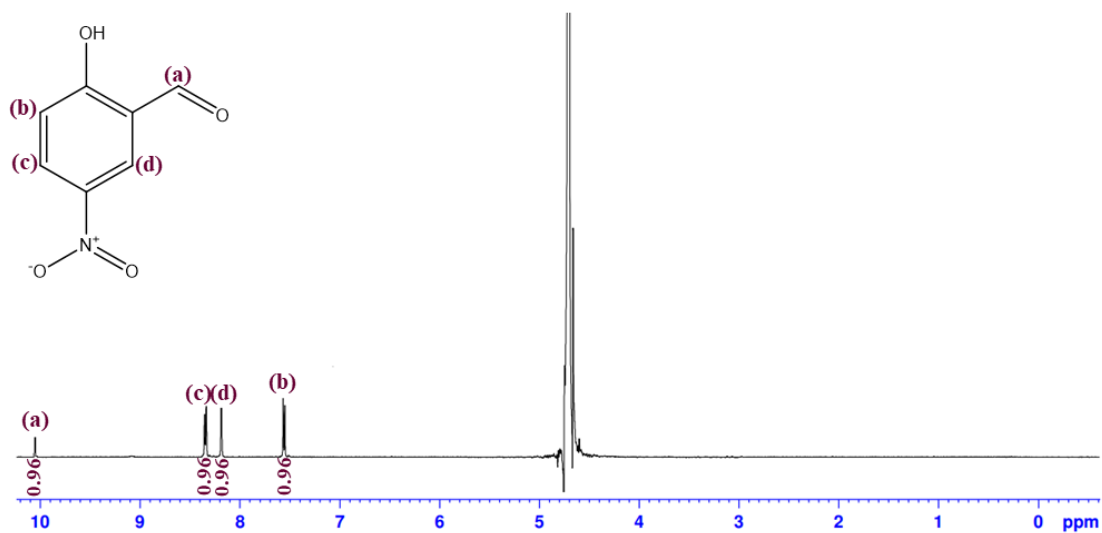

**Fig. S22:** <sup>1</sup>H NMR spectrum of 2-hydroxy-5-nitrobenzaldehyde (Table-3, entry 11)

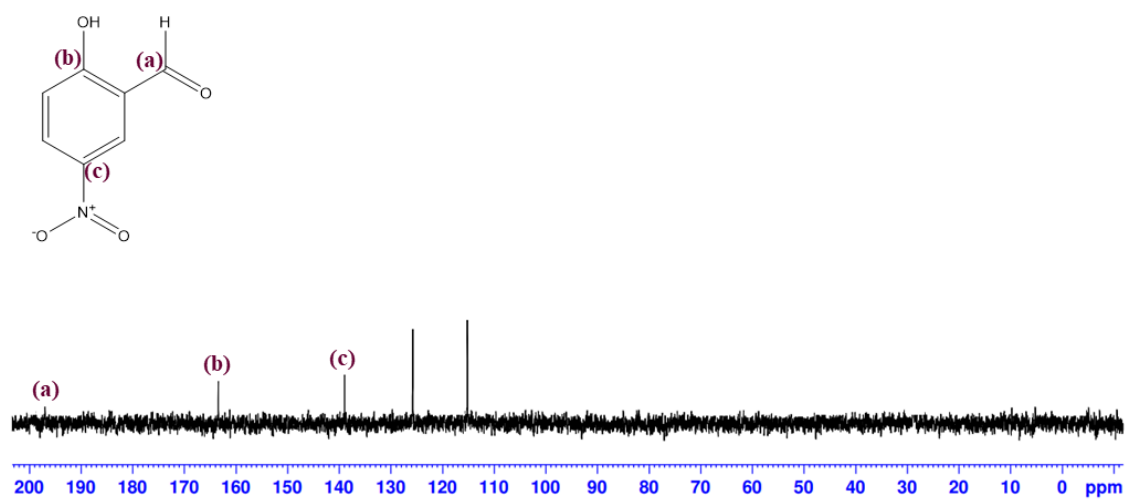

**Fig. S23:** <sup>13</sup>C NMR spectrum of 2-hydroxy-5-nitrobenzaldehyde (Table-3, entry 11)

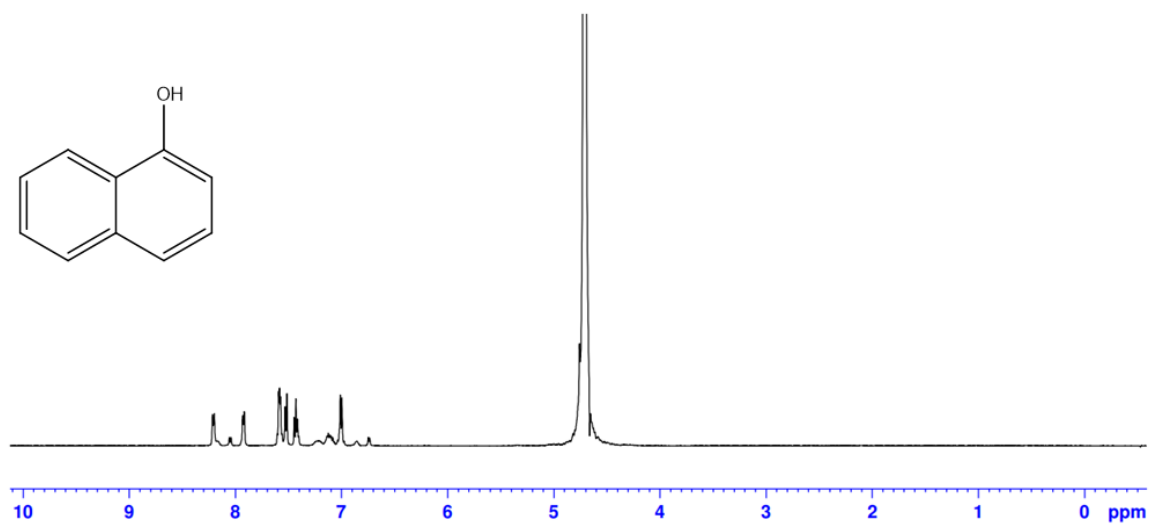

**Fig. S24:** <sup>1</sup>H NMR spectrum of 1-hydroxy-2-naphthaldehyde (Table-3, entry 14)

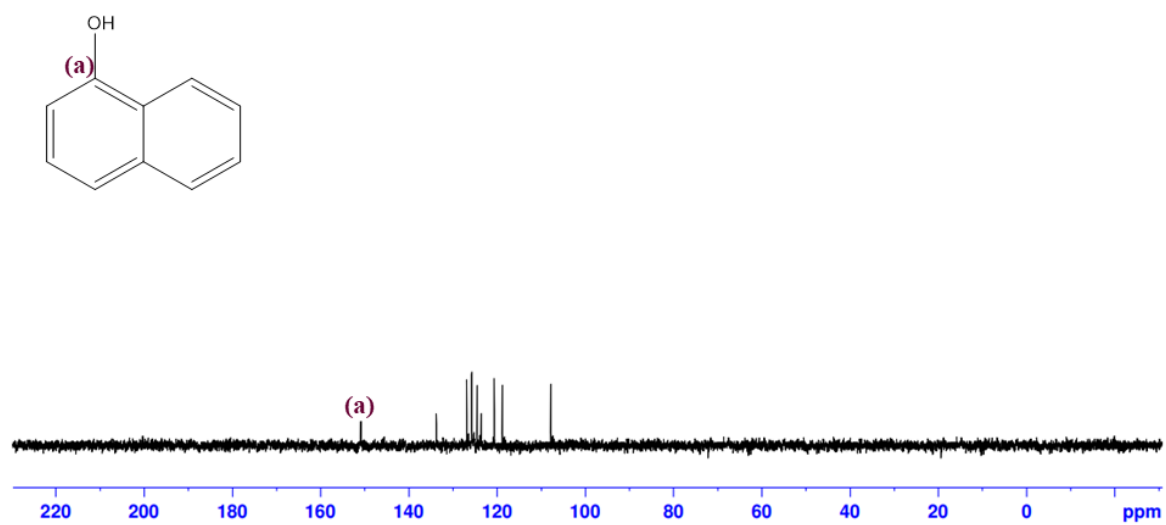

**Fig. S25:** <sup>13</sup>C NMR spectrum of 1-hydroxy-2-naphthaldehyde (Table-3, entry 14)
